# Supplementary material for: Prenatal broad-spectrum cannabidiol administration prevents an autism-like phenotype in male offspring from a maternal stress/terbutaline rat model
Source: PubMed Central journal article supplement — Brain Behav Immun Health. 2024 Jul 21;40:100828. doi: 10.1016/j.bbih.2024.100828 (PMC11337682; doi:10.1016/j.bbih.2024.100828), 2024-07-21
Supplement: mmc1.pdf [file mmc1.pdf]

Broad Spectrum Hemp Extract

|                  |              |                   |                       |
|------------------|--------------|-------------------|-----------------------|
| <b>Batch ID:</b> | CB20219      | <b>Test ID:</b>   | T000157929            |
| <b>Type:</b>     | Concentrate  | <b>Submitted:</b> | 08/09/2021 @ 01:33 PM |
| <b>Test:</b>     | Terpenes     | <b>Started:</b>   | 8/18/2021             |
| <b>Method:</b>   | TM22 (GC-MS) | <b>Reported:</b>  | 8/19/2021             |

TERPENE PROFILE

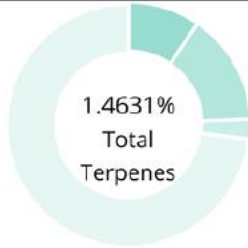

| Compound                | %(w/w)        | mg/g          |
|-------------------------|---------------|---------------|
| (-)-alpha-Bisabolol     | 0.9477        | 9.477         |
| Camphene                | 0.0000        | 0.000         |
| delta-3-Carene          | 0.0000        | 0.000         |
| beta-Caryophyllene      | 0.1916        | 1.916         |
| (-)-Caryophyllene Oxide | 0.0459        | 0.459         |
| p-Cymene                | 0.0009        | 0.009         |
| Eucalyptol              | 0.0136        | 0.136         |
| Geraniol                | 0.0157        | 0.157         |
| alpha-Humulene          | 0.0331        | 0.331         |
| (-)-Isopulegol          | 0.0000        | 0.000         |
| d-Limonene              | 0.0000        | 0.000         |
| Linalool                | 0.1220        | 1.220         |
| beta-Myrcene            | 0.0000        | 0.000         |
| cis-Nerolidol           | 0.0000        | 0.000         |
| trans-Nerolidol         | 0.0898        | 0.898         |
| Ocimene                 | 0.0000        | 0.000         |
| beta-Ocimene            | 0.0000        | 0.000         |
| alpha-Pinene            | 0.0000        | 0.000         |
| (-)-beta-Pinene         | 0.0000        | 0.000         |
| alpha-Terpinene         | 0.0014        | 0.014         |
| gamma-Terpinene         | 0.0014        | 0.014         |
| Terpinolene             | 0.0000        | 0.000         |
|                         | <b>1.4631</b> | <b>14.631</b> |

PREDOMINANT TERPENES

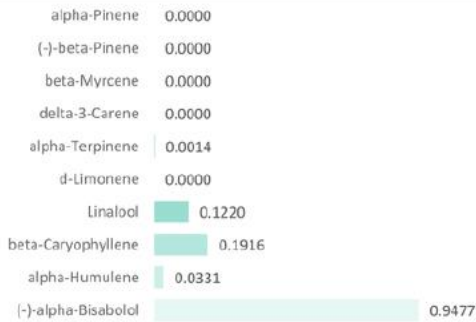

NOTES:  
N/A

FINAL APPROVAL

|                                                                                     |                                             |                                                                                     |                                      |
|-------------------------------------------------------------------------------------|---------------------------------------------|-------------------------------------------------------------------------------------|--------------------------------------|
|  | Daniel Weidensaul<br>19-Aug-2021<br>5:08 PM |  | Ryan Weems<br>19-Aug-2021<br>5:10 PM |
|-------------------------------------------------------------------------------------|---------------------------------------------|-------------------------------------------------------------------------------------|--------------------------------------|

PREPARED BY / DATE

APPROVED BY / DATE

Testing results are based solely upon the sample submitted to Botanacor Laboratories, LLC. Botanacor Laboratories, LLC warrants that all analytical work is conducted professionally in accordance with all applicable standard laboratory practices using validated methods. Data was generated using an unbroken chain of comparison to NIST traceable Reference Standards and Certified Reference Materials. This report may not be reproduced, except in full, without the written approval of Botanacor Laboratories, LLC. ISO/IEC 17025:2005 Accredited AZLA Certificate Number 4329.02

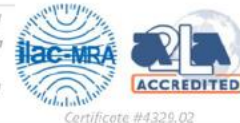

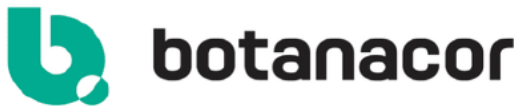

CERTIFICATE OF ANALYSIS  
prepared for: Colorado Botanicals

Broad Spectrum Hemp Extract

|                  |               |                   |                       |
|------------------|---------------|-------------------|-----------------------|
| <b>Batch ID:</b> | CB20219       | <b>Test ID:</b>   | T000157931            |
| <b>Type:</b>     | Concentrate   | <b>Submitted:</b> | 08/09/2021 @ 01:33 PM |
| <b>Test:</b>     | Metals        | <b>Started:</b>   | 8/17/2021             |
| <b>Method:</b>   | TM19 (ICP-MS) | <b>Reported:</b>  | 8/18/2021             |

HEAVY METALS

| Analyte | Dynamic Range (ppm) | Result (ppm) |
|---------|---------------------|--------------|
| Arsenic | 0.045 - 4.48        | ND           |
| Cadmium | 0.045 - 4.46        | ND           |
| Mercury | 0.044 - 4.44        | ND           |
| Lead    | 0.041 - 4.14        | ND           |

\* ND = None Detected (Defined by Dynamic Range of the method)

FINAL APPROVAL

  
Ryan Weems  
18-Aug-2021  
4:04 PM

PREPARED BY / DATE

  
Sam Smith  
18-Aug-2021  
4:15 PM

APPROVED BY / DATE

Testing results are based solely upon the sample submitted to Botanacor Laboratories, LLC, in the condition it was received. Botanacor Laboratories, LLC warrants that all analytical work is conducted professionally in accordance with all applicable standard laboratory practices using validated methods. Data was generated using an unbroken chain of comparison to NIST traceable Reference Standards and Certified Reference Materials. This report may not be reproduced, except in full, without the written approval of Botanacor Laboratories, LLC.

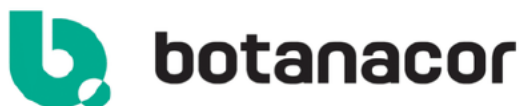

CERTIFICATE OF ANALYSIS

Prepared for:

Broad Spectrum Hemp Extract

Colorado Botanicals

Table with 4 columns: Batch ID or Lot Number, Test, Reported, Matrix, Test ID, Started, USDA License, Status, Method, Received, Sampler ID.

PESTICIDE DETERMINATION

Table with 9 columns: Compound, LOQ (ppb), Result (ppb), Compound, LOQ (ppb), Result (ppb), Compound, LOQ (ppb), Result (ppb).

Signature of Sam Smith, 8/18/2021 1:39:00 PM

Signature of Taylor Brevik, 8/18/2021 1:46:00 PM

PREPARED BY / DATE

APPROVED BY / DATE

Definitions

LOQ = Limit of Quantification
ppb = Parts per Billion

Testing results are based solely upon the sample submitted to Botanacor Laboratories, LLC, in the condition it was received. Botanacor Laboratories, LLC warrants that all analytical work is conducted professionally in accordance with all applicable standard laboratory practices using validated methods.

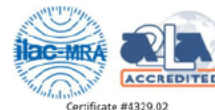

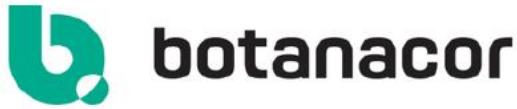

# CERTIFICATE OF ANALYSIS

Prepared for:

**Broad Spectrum Hemp Extract**

**Colorado Botanicals**

Batch ID or Lot Number: **CB20219**      Test: **Residual Solvents**      Reported: **8/17/21**

Matrix: N/A      Test ID: T000157932      Started: 8/16/21      USDA License: N/A

Status: N/A      Methods: TM04 (GC-MS); Residual Solvents      Received: 08/09/2021 @ 01:33 PM      Sampler ID: N/A

## RESIDUAL SOLVENTS DETERMINATION

| Solvent                          | Dynamic Range (ppm) | Result (ppm) | Notes |
|----------------------------------|---------------------|--------------|-------|
| Propane                          | 85 - 1695           | *ND          |       |
| Butanes<br>(Isobutane, n-Butane) | 161 - 3215          | *ND          |       |
| Methanol                         | 62 - 1230           | *ND          |       |
| Pentane                          | 90 - 1798           | *ND          |       |
| Ethanol                          | 98 - 1958           | *ND          |       |
| Acetone                          | 101 - 2016          | *ND          |       |
| Isopropyl Alcohol                | 107 - 2145          | *ND          |       |
| Hexane                           | 6 - 125             | *ND          |       |
| Ethyl Acetate                    | 103 - 2050          | *ND          |       |
| Benzene                          | 0 - 4               | *ND          |       |
| Heptanes                         | 96 - 1925           | 1205         |       |
| Toluene                          | 18 - 368            | *ND          |       |
| Xylenes<br>(m,p,o-Xylenes)       | 134 - 2681          | *ND          |       |

  
Taylor Brevik  
17-Aug-21  
1:37 PM

PREPARED BY / DATE

  
Daniel Weidensaul  
17-Aug-21  
1:42 PM

APPROVED BY / DATE

### Definitions

\* ND = None Detected (Defined by Dynamic Range of the method)

Testing results are based solely upon the sample submitted to Botanacor Laboratories, LLC, in the condition it was received. Botanacor Laboratories, LLC warrants that all analytical work is conducted professionally in accordance with all applicable standard laboratory practices using validated methods. Data was generated using an unbroken chain of comparison to NIST traceable Reference Standards and Certified Reference Materials. This report may not be reproduced, except in full, without the written approval of Botanacor Laboratories, LLC.

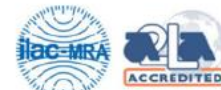

Certificate #5219.02

**Broad Spectrum Hemp Extract**

|                  |                 |                   |                       |
|------------------|-----------------|-------------------|-----------------------|
| <b>Batch ID:</b> | CB20219         | <b>Test ID:</b>   | T000157928            |
| <b>Type:</b>     | Concentrate     | <b>Submitted:</b> | 08/09/2021 @ 01:33 PM |
| <b>Test:</b>     | Potency         | <b>Started:</b>   | 8/19/2021             |
| <b>Method:</b>   | TM14 (HPLC-DAD) | <b>Reported:</b>  | 8/20/2021             |

**CANNABINOID PROFILE**
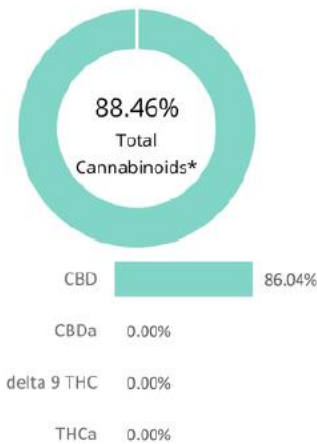

| Compound                                     | LOQ (%) | Result (%)   | Result (mg/g) |
|----------------------------------------------|---------|--------------|---------------|
| Delta 9-Tetrahydrocannabinolic acid (THCA-A) | 0.13    | ND           | ND            |
| Delta 9-Tetrahydrocannabinol (Delta 9THC)    | 0.14    | ND           | ND            |
| Cannabidiolic acid (CBDA)                    | 0.20    | ND           | ND            |
| Cannabidiol (CBD)                            | 0.20    | 86.04        | 860.4         |
| Delta 8-Tetrahydrocannabinol (Delta 8THC)    | 0.15    | ND           | ND            |
| Cannabinolic Acid (CBNA)                     | 0.09    | ND           | ND            |
| Cannabinol (CBN)                             | 0.04    | ND           | ND            |
| Cannabigerolic acid (CBGA)                   | 0.13    | ND           | ND            |
| Cannabigerol (CBG)                           | 0.03    | 1.72         | 17.2          |
| Tetrahydrocannabivarinic Acid (THCVA)        | 0.11    | ND           | ND            |
| Tetrahydrocannabivarin (THCV)                | 0.03    | ND           | ND            |
| Cannabivarinic Acid (CBDVA)                  | 0.08    | ND           | ND            |
| Cannabivarin (CBDV)                          | 0.05    | 0.70         | 7.0           |
| Cannabichromenic Acid (CBCA)                 | 0.05    | ND           | ND            |
| Cannabichromene (CBC)                        | 0.05    | ND           | ND            |
| <b>Total Cannabinoids</b>                    |         | <b>88.46</b> | <b>884.6</b>  |
| Total Potential THC**                        |         | ND           | ND            |
| Total Potential CBD**                        |         | 86.04        | 860.4         |

## NOTES:

N/A

% = % (w/w) = Percent (Weight of Analyte / Weight of Product)

\* Total Cannabinoids result reflects the absolute sum of all cannabinoids detected.

\*\* Total Potential THC/CBD is calculated using the following formulas to take into account the loss of a carboxyl group during decarboxylation step.

$$\text{Total THC} = \text{THC} + (\text{THCa} \times 0.877)$$

$$\text{Total CBD} = \text{CBD} + (\text{CBDa} \times 0.877)$$

ND = None Detected (Defined by Dynamic Range of the method)

**FINAL APPROVAL**

|                                                                                     |                                              |                                                                                     |                                             |
|-------------------------------------------------------------------------------------|----------------------------------------------|-------------------------------------------------------------------------------------|---------------------------------------------|
|  | <b>Ryan Weems</b><br>20-Aug-2021<br>11:17 AM |  | <b>Sam Smith</b><br>20-Aug-2021<br>11:28 AM |
|-------------------------------------------------------------------------------------|----------------------------------------------|-------------------------------------------------------------------------------------|---------------------------------------------|

PREPARED BY / DATE

APPROVED BY / DATE

Testing results are based solely upon the sample submitted to Botanacor Laboratories, LLC, in the condition it was received. Botanacor Laboratories, LLC warrants that all analytical work is conducted professionally in accordance with all applicable standard laboratory practices using validated methods. Data was generated using an unbroken chain of comparison to NIST traceable Reference Standards and Certified Reference Materials. This report may not be reproduced, except in full, without the written approval of Botanacor Laboratories, LLC. ISO/IEC 17025:2005 Accredited A2LA Certificate Number 4329.02

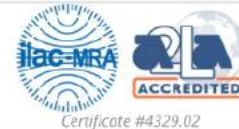

**Supplemental Figure 1.** Certificate of analysis for the broad-spectrum cannabidiol oil extract used. An analysis of CBD potency, quantities of terpenes, and the presence of metals/pesticides/residual solvents was performed by Botanacor Laboratories™ (Denver, CO, USA) on batch #CB20219 is shown above (100 mg/mL CBD, hemp extract, organic MCT oil, CO2 extracted, Colorado Botanicals, Denver, CO, USA).
